# Supplementary material for: Reduced tonic inhibition after stroke promotes motor performance and epileptic seizures
Source: PubMed Central journal article supplement (PMC4870642; doi:10.1038/srep26173), 2016-05-18
Supplement: srep26173-s1.pdf [file srep26173-s1.pdf]

## Supplementary information

**Title: Reduced tonic inhibition after stroke promotes motor performance and epileptic seizures**

**Authors:** Nadine Jaenisch <sup>1</sup>, Lutz Liebmann <sup>2</sup>, Madlen Guenther <sup>1</sup>, Christian A. Hübner <sup>2</sup>, Christiane Frahm <sup>1</sup>\*, Otto W. Witte <sup>1</sup>\*

**Supplementary Table 1: Primers and antibodies**

| Primers for qPCR of rat brain samples   |                |                                                          |            |
|-----------------------------------------|----------------|----------------------------------------------------------|------------|
| mRNA                                    | NM number      | Sequence 5' → 3'                                         | Product bp |
| <b>Gapdh</b>                            | NM_017008      | Fwd: GCATTGCTCTCAATGACAACCT<br>Rev: GGCCTCTCTTGTCTCTCAGT | 162        |
| <b>Tubb3</b>                            | NM_139254.2    | Fwd: GGCAACTATGTGGGGGACT<br>Rev: GCACCACTCTGACCGAAGAT    | 191        |
| <b>Gabra1</b>                           | NM_183326.2    | Fwd: GATGGCAAAGCGTGGTTC<br>Rev: TCGGTTCTATGGTCGCACTT     | 160        |
| <b>Gabra2</b>                           | NM_001135779.1 | Fwd: CAGCGAGAAGTGTGTTTGGGA<br>Rev: CCACTTTGGGAAGGGAATTT  | 84         |
| <b>Gabra3</b>                           | NM_017069.1    | Fwd: TGGTCATGTTGTTGGGACAG<br>Rev: TGGCAAGTAGGTCTGGATGA   | 118        |
| <b>Gabra4</b>                           | NM_080587.3    | Fwd: AGGAGTCTGTTCCAGCCAGA<br>Rev: AAAGAATGCCGAGCACTGAT   | 85         |
| <b>Gabra5</b>                           | NM_017295.1    | Fwd: CAGACGTACCTTCCCTGCAT<br>Rev: GGTTGTCATGGTCAGCACTG   | 120        |
| <b>Gabrb1</b>                           | NM_012956.1    | Fwd: CAAGACCAGAGTGCCAATGA<br>Rev: CCAGGGTGCTGAGGAGAATA   | 88         |
| <b>Gabrb2</b>                           | NM_012957.2    | Fwd: GTCAACAAGATGGACCCACA<br>Rev: GAGGCATCATAGGCAAGCAT   | 128        |
| <b>Gabrb3</b>                           | NM_017065.1    | Fwd: GACAGCCAAGGCCAAGAAT<br>Rev: TGAACATCCATCGGTGCTAG    | 90         |
| <b>Gabrg1</b>                           | NM_080586.1    | Fwd: AACCACCAGAGACAGGAAGC<br>Rev: TTCCCCTTGAGGCATAGAAA   | 106        |
| <b>Gabrg2</b>                           | NM_183327.1    | Fwd: TGTCCTGGGTATCCTTCTGG<br>Rev: AGAGACTTCCGGGCTATGGT   | 112        |
| <b>Gabrg3</b>                           | NM_024370.3    | Fwd: TCCCCTGCATACTGACTGTG<br>Rev: CGTGGTGATGCCTAATGTTG   | 92         |
| <b>Gabrd</b>                            | NM_017289.1    | Fwd: AGAAACGGAAAGCCAAGGTC<br>Rev: CCTCCTTCTTTGCCTCCA     | 189        |
| Primers for qPCR of mouse brain samples |                |                                                          |            |
| mRNA                                    | NM number      | Sequence 5' → 3'                                         | Product bp |
| <b>Gapdh</b>                            | NM_008084.2    | Fwd: CAACAGCAACTCCCCTCTTC<br>Rev: GGTCCAGGGTTTCTTACTCCTT | 164        |
| <b>Tubb3</b>                            | NM_023279.2    | Fwd: GCCTTTGGACACCTATTCAGG<br>Rev: ACTCTTCCGCACGACATCT   | 133        |
| <b>Gabra1</b>                           | NM_010250.4    | Fwd: GATGGCAAAGCGTGGTTC<br>Rev: TCGGTTCTATGGTCGCACTT     | 160        |
| <b>Gabra2</b>                           | NM_008066.3    | Fwd: TTGGGACGGGAAGAGTGTAG<br>Rev: TGGCTTGTTCTCTGGCTTCT   | 184        |

|                                        |                 |                                                                                                                                |            |
|----------------------------------------|-----------------|--------------------------------------------------------------------------------------------------------------------------------|------------|
| <b>Gabra3</b>                          | NM_008067.4     | Fwd: GCCGTCTGTTATGCCTTTGT<br>Rev: CCTTGGCCAGATTGATAGGA                                                                         | 199        |
| <b>Gabra4</b>                          | NM_010251.2     | Fwd: CCCATGAGACTGGTGGATTT<br>Rev: ACAGTCTGCCCAATGAGGTC                                                                         | 176        |
| <b>Gabra5</b>                          | NM_176942.4     | Fwd: AAGAAAGCCCTGGAAGCAG<br>Rev: GTTTGGAGGATGGGTCAGC                                                                           | 105        |
| <b>Gabrb1</b>                          | NM_008069.4     | Fwd: CAAGACCAGAGTGCCAATGA<br>Rev: TGGTCTCGTTCCTGATTTC                                                                          | 106        |
| <b>Gabrb2</b>                          | NM_008070.3     | Fwd: TGCCAACAATGAGAAGATGC<br>Rev: CCCATTACTGCTTCGGATGT                                                                         | 114        |
| <b>Gabrb3</b>                          | NM_008071.3     | Fwd: ACAATCCTCTCGTGGGTGTC<br>Rev: GAGTCTCCCGAAGGTGAGTG                                                                         | 118        |
| <b>Gabrg1</b>                          | NM_010252.4     | Fwd: TGGAATACGGAACCTTGCAT<br>Rev: TGCTGTTCATGGGAATGAGA                                                                         | 132        |
| <b>Gabrg2</b>                          | NM_008073.2     | Fwd: GGGCTACTTCACCATCCAGA<br>Rev: GACCTTGGGCAGAGATTTTC                                                                         | 172        |
| <b>Gabrg3</b>                          | NM_008074.2     | Fwd: GAAGACTCCCCATCAAACCA<br>Rev: ATTCCAATGTCCGGTCTCAG                                                                         | 122        |
| <b>Gabrd</b>                           | NM_008072.2     | Fwd: CCACTTCAATGCCGACTACA<br>Rev: TGAGAGGGAGAAAAGGACGA                                                                         | 106        |
| <b>Antibodies for Western blotting</b> |                 |                                                                                                                                |            |
| <b>Ab</b>                              | <b>Dilution</b> | <b>Company</b>                                                                                                                 | <b>kDa</b> |
| <b>β-Actin</b>                         | 1:90.000        | beta-actin; ab8227, Abcam, UK                                                                                                  | 42         |
| <b>TUJ1</b>                            | 1:90.000        | Neuronal Class III β-Tubulin; TUJ1, Covance, USA                                                                               | 51         |
| <b>GABRD</b>                           | 1:250           | GABA <sub>A</sub> Rδ; sc25705, Santa Cruz Biotechnology, USA                                                                   | 51         |
| <b>GABRD</b>                           | 1:500           | GABA <sub>A</sub> subunit δ, kindly provided by Werner Sieghart, Center for Brain Research, Medical University Vienna, Austria | 51         |
| <b>GABRA5</b>                          | 1:2000          | GABA <sub>A</sub> receptor α5 antibody, <sup>1</sup>                                                                           | 52         |
| <b>GAT-3</b>                           | 1:5000          | Rabbit anti-GABA transporter-3 (GAT-3) polyclonal antibody, AB1574, Millipore, Germany                                         | 70         |
| <b>goat @ rbt IgG</b>                  | 1:5000          | HRP-conjugated goat anti-rabbit IgG antibody; 1:5000, sc-2004; Santa Cruz Biotechnology, USA                                   |            |
| <b>goat @ mouse IgG</b>                | 1:5000          | HRP-conjugated goat anti-mouse IgG antibody; 1:5000, sc-2002; Santa Cruz Biotechnology, USA                                    |            |
| <b>goat @ guinea pig IgG</b>           | 1:5000          | HRP-conjugated goat anti-guinea-pig IgG antibody; 1:5000, sc-2438; Santa Cruz Biotechnology, USA                               |            |

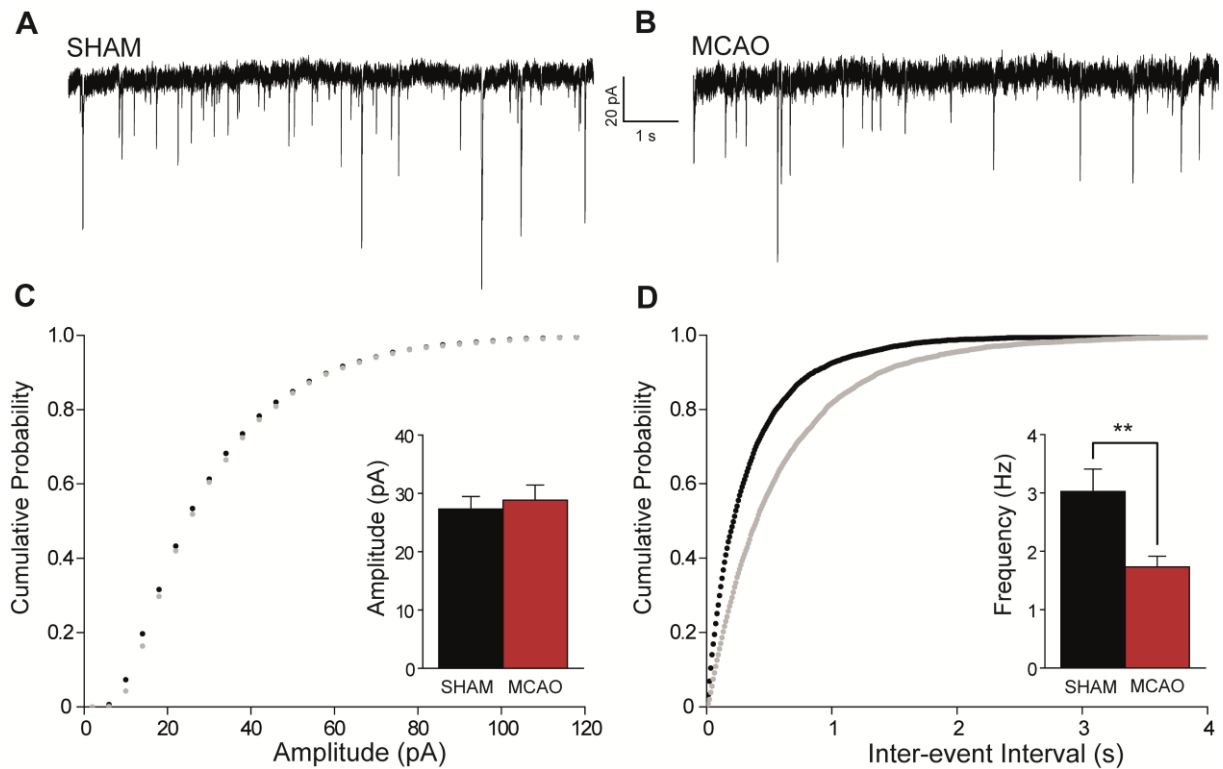

**Supplementary Fig. 1. Synaptic GABAergic inhibition 7 days after stroke.** The frequency of sIPSCs, but not the amplitude, decreased in cortical neurons of MCAO-treated mice. **(A, B)** Representative traces of a sIPSC recorded in cortical neurons (layer 2/3) of control and MCAO mice. **(C)** Cumulative plots and the means of sIPSC amplitudes did not differ between the groups (cells n=10/12, mice n=3). **(D)** Cumulative plots of inter-event intervals and means of frequencies revealed a shift to longer intervals in neurons of the ischemic cortex (cells n=10/12, mice n=3, \*\*p<0.01).

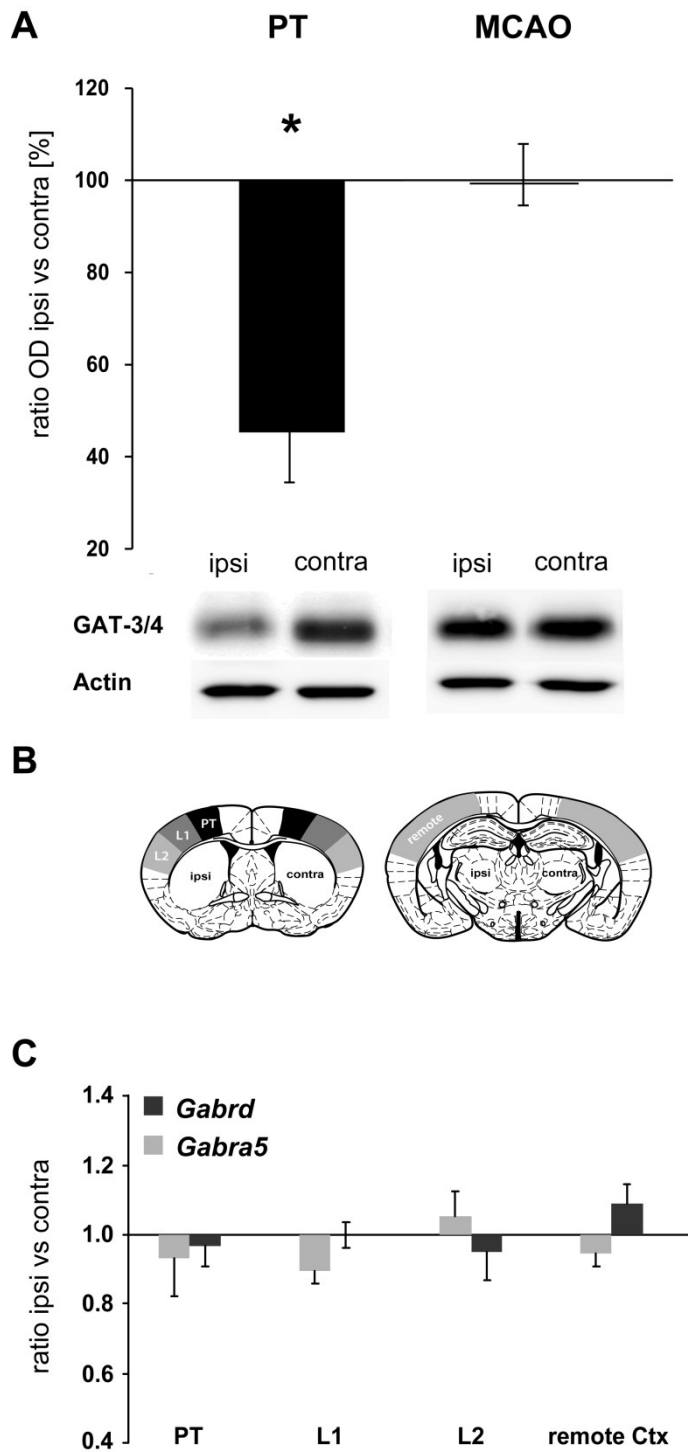

**Supplementary Fig. 2. GABA transporter GAT3/4 and GABA<sub>A</sub> receptor subunits *Gabrd* and *Gabra5* at 7days following stroke in mice.** (A) GAT3/4 was reduced following photothrombosis but remained stable following MCAO. Optical densities of GAT3/4 in a ratio to  $\beta$ -actin are diagrammed as the percent relative to the contralateral hemisphere $\pm$ s.e.m (PT: n=3, MCAO: n=4, \*p $\leq$ 0.05). (B) Scheme of analyzed brain areas (PT: injured tissue inclusive glial scar; L1, L2: perilesional lateral regions and remote cortical area), modified from The Mouse Brain in Stereotaxic Coordinates<sup>2</sup>. (C) Normalization of *Gabrd* and *Gabra5*

to *Tubb3* showed stable post-photothrombotic RNA expression. Data are displayed as the geomean of ratios (ipsi vs. contra)±s.e.m. (PT: n=5).

1. Fritschy, J.M. & Mohler, H. GABAA-receptor heterogeneity in the adult rat brain: differential regional and cellular distribution of seven major subunits. *J Comp Neurol* **359**, 154-194 (1995).
2. Paxinos, G. & Franklin, K.B.J. *The Mouse Brain in Stereotaxic Coordinates* (Academic Press, San Diego, 2001).
